# Supplementary material for: Relative leucocyte telomere length is associated with incident end-stage kidney disease and rapid decline of kidney function in type 2 diabetes: analysis from the Hong Kong Diabetes Register
Source: PubMed Central journal article supplement (PMC8741666; doi:10.1007/s00125-021-05613-1), 2021-11-22
Supplement: 125_2021_5613_MOESM1_ESM.pdf [file 125_2021_5613_MOESM1_ESM.pdf]

ESM Table 1. Baseline characteristics according to the tertiles of relative leucocyte telomere length.

| Baseline variables                              | T1≤4.20           | 4.20<T2≤5.13      | T3>5.13           | P value |
|-------------------------------------------------|-------------------|-------------------|-------------------|---------|
| Number                                          | 1362              | 1361              | 1362              |         |
| Age, year                                       | 56.02 ± 12.48     | 53.90 ± 12.91     | 52.94 ± 12.24     | <0.001  |
| Male, %                                         | 631 (46.3%)       | 612 (45.0%)       | 610 (44.8%)       | 0.419   |
| Duration of diabetes, year                      | 6.71 ± 6.14       | 5.99 ± 6.12       | 5.44 ± 5.95       | <0.001  |
| Current smoker, %                               | 190 (14.0%)       | 209 (15.4%)       | 198 (14.6%)       | 0.653   |
| Ever smoked, %                                  | 433 (31.8%)       | 388 (28.6%)       | 375 (27.6%)       | 0.016   |
| Current drinker, %                              | 125 (9.2%)        | 123 (9.1%)        | 165 (12.2%)       | 0.011   |
| Ever drinker, %                                 | 303 (22.4%)       | 268 (19.8%)       | 289 (21.4%)       | 0.510   |
| SBP, mmHg                                       | 134.83 ± 20.17    | 131.51 ± 18.92    | 130.59 ± 18.68    | <0.001  |
| DBP, mmHg                                       | 76.81 ± 11.00     | 75.63 ± 10.52     | 75.44 ± 10.06     | 0.001   |
| BMI, kg/m <sup>2</sup>                          | 25.13 ± 3.89      | 25.36 ± 4.16      | 25.36 ± 4.25      | 0.139   |
| HbA <sub>1c</sub> , mmol                        | 61.69 ± 20.35     | 59.57 ± 19.74     | 57.80 ± 18.89     | <0.001  |
| HbA <sub>1c</sub> , %                           | 7.79 ± 1.86       | 7.60 ± 1.81       | 7.44 ± 1.73       | <0.001  |
| FPG, mmol/l                                     | 8.97 ± 3.31       | 8.65 ± 3.31       | 8.32 ± 3.23       | <0.001  |
| TC, mmol/l                                      | 5.28 ± 1.11       | 5.09 ± 1.13       | 5.08 ± 1.10       | <0.001  |
| HDL-C, mmol/l                                   | 1.31 ± 0.38       | 1.33 ± 0.38       | 1.36 ± 0.40       | 0.001   |
| LDL-C, mmol/l                                   | 3.24 ± 0.99       | 3.02 ± 0.92       | 2.98 ± 0.93       | <0.001  |
| Triacylglycerol, mmol/l                         | 1.33 [0.91, 2.02] | 1.30 [0.90, 1.90] | 1.35 [0.95, 1.97] | 0.956*  |
| Urinary ACR, mg/mmol                            | 1.94 [0.83, 8.15] | 1.49 [0.65, 5.24] | 1.37 [0.68, 4.25] | <0.001* |
| eGFR, ml min <sup>-1</sup> 1.73 m <sup>-2</sup> | 89.66 ± 17.00     | 90.78 ± 17.02     | 91.77 ± 16.46     | 0.001   |
| RBC, 10 <sup>12</sup> /l                        | 4.71 ± 0.57       | 4.71 ± 0.56       | 4.77 ± 0.59       | 0.030   |
| HB, g/l                                         | 13.94 ± 1.50      | 13.91 ± 1.51      | 13.98 ± 1.50      | 0.513   |
| WBC, 10 <sup>9</sup> /l                         | 7.35 ± 4.07       | 7.17 ± 1.86       | 7.08 ± 1.88       | 0.021   |
| <b>Diagnosed comorbidity</b>                    |                   |                   |                   |         |
| Retinopathy, %                                  | 343 (25.2%)       | 303 (22.3%)       | 295 (21.7%)       | 0.029   |
| Neuropathy, %                                   | 293 (21.5%)       | 232 (17.0%)       | 157 (11.5%)       | <0.001  |
| Microalbuminuria, %                             | 387 (29.2%)       | 320 (24.4%)       | 311 (23.7%)       | 0.001   |
| Macroalbuminuria, %                             | 165 (12.5%)       | 126 (9.6%)        | 97 (7.4%)         | <0.001  |
| <b>Use of medications</b>                       |                   |                   |                   |         |
| Lipid lowering drugs, %                         | 171 (12.6%)       | 213 (15.7%)       | 245 (18.0%)       | <0.001  |
| Antihypertensive drugs, %                       | 539 (39.6%)       | 523 (38.4%)       | 514 (37.7%)       | 0.325   |
| Oral antihyperglycemic drugs, %                 | 875 (64.2%)       | 925 (68.0%)       | 952 (69.9%)       | 0.002   |
| Insulin use, %                                  | 191 (14.0%)       | 180 (13.2%)       | 164 (12.0%)       | 0.125   |
| RAS inhibitors (ACEIs or ARBs), %               | 244 (17.9%)       | 220 (16.2%)       | 236 (17.3%)       | 0.684   |

All data are shown as mean ± SD, median (Q1-Q3) or proportion in %; All comparisons of clinical characteristics was conducted by using linear regression for continuous variables and logistic regression for category variables with/without adjustment for age; \*logarithmic

transformation was used in TG and ACR. A one-unit increase in  $\log(\text{TG})$  or  $\log(\text{ACR}+1)$  corresponds to a 10-fold increase in TG, or (ACR+1), respectively.

Abbreviations: BMI, body mass index; SBP, systolic blood pressure; DBP, diastolic blood pressure; HbA<sub>1c</sub>, Haemoglobin A1c; FPG, fasting plasma glucose; TC, total cholesterol; TG, triacylglycerol; HDL-C, high-density lipoprotein cholesterol; LDL-C, low-density lipoprotein cholesterol; eGFR, estimated glomerular filtration rate; ACR, urinary albumin to creatinine ratio; RAS inhibitors, renin angiotensin system inhibitors; ACEIs, angiotensin converting enzyme inhibitors; ARBs, angiotensin receptor blockers. T1, tertile 1; T2, tertile 2, T3, tertile 3.

ESM Table 2. Cox regression analysis of the association between shorter rLTL and incident end stage kidney disease in subgroups

| ESKD                         | Events/Total (%) | Hazard Ratio (95% CI) |                      |                  |
|------------------------------|------------------|-----------------------|----------------------|------------------|
|                              |                  | Unadjusted model      | Fully adjusted model | <i>p value</i> * |
| Overall                      | 564/4085 (13.8%) | 1.21 (1.13-1.30)      | 1.11 (1.03-1.19)     | <b>0.007</b>     |
| Males                        | 263/1853 (14.2%) | 1.18 (1.07-1.31)      | 1.07 (0.95-1.21)     | 0.240            |
| Females                      | 301/2232 (13.5%) | 1.24 (1.13-1.36)      | 1.11 (1.01-1.22)     | <b>0.025</b>     |
| Age at diagnosis of diabetes |                  |                       |                      |                  |
| < 40 years                   | 107/1017 (10.5%) | 1.19 (1.01-1.40)      | 1.24 (1.03-1.49)     | <b>0.026</b>     |
| 40+ years                    | 457/3067 (14.9%) | 1.20 (1.11-1.29)      | 1.09 (1.00-1.18)     | <b>0.039</b>     |

rLTL, relative leucocyte telomere length calculated by negative control (water); ESKD, end stage kidney disease. \* P value for fully adjusted model; Full adjusted model included age, sex, duration of diabetes, BMI, SBP, DBP, HbA<sub>1c</sub>, LDL-C, Log (TG), HDL-C, eGFR, Log (ACR), retinopathy, neuropathy and CVD at baseline. Sex and retinopathy were included as strata variables.

ESM Table 3 Competing Risk Regression analysis showing subdistribution HRs of rLTL for incident end stage kidney disease.

| Subdistribution HRs | rLTL (each unit decrease)<br>sHR | <i>p value</i>   |
|---------------------|----------------------------------|------------------|
| Model 1             | 1.19 (1.11-1.26)                 | <b>&lt;0.001</b> |
| Model 2             | 1.14 (1.07-1.22)                 | <b>&lt;0.001</b> |
| Model 3             | 1.12 (1.06-1.19)                 | <b>&lt;0.001</b> |
| Model 4             | 1.10 (1.02-1.18)                 | <b>0.009</b>     |
| Model 5             | 1.10 (1.02-1.18)                 | <b>0.009</b>     |

sHR, subdistribution hazards ratio; rLTL, relative leucocyte telomere length calculated by negative control (water).

Sex and retinopathy were included as strata variables.

Model 1: without adjustment

Model 2: adjusted for age and sex

Model 3: Model 2 + adjusted for duration of diabetes, BMI, SBP and DBP

Model 4: Model 3 + adjusted for HbA1c, LDL-C, log<sub>10</sub> (triacylglycerol), HDL-C, eGFR and log<sub>10</sub> (ACR)

Model 5: Model 4 + retinopathy, neuropathy and CVD at baseline.



ESM Table 4 Hazard ratio (95% CI) for incident end stage kidney disease according to tertiles (T) of rLTL

| Variables                                       | Model 1          |                  | Model 2          |                  | Model 3          |                  | Model 4          |                  | Model 5          |                  |
|-------------------------------------------------|------------------|------------------|------------------|------------------|------------------|------------------|------------------|------------------|------------------|------------------|
|                                                 | HR (95%CI)       | <i>p</i> value   | HR (95%CI)       | <i>p</i> value   | HR (95%CI)       | <i>p</i> value   | HR (95%CI)       | <i>p</i> value   | HR (95%CI)       | <i>p</i> value   |
| T1 (rLTL≤4.20)                                  | 1.77 (1.43-2.19) | <b>&lt;0.001</b> | 1.56 (1.26-1.93) | <b>&lt;0.001</b> | 1.48 (1.19-1.83) | <b>&lt;0.001</b> | 1.41 (1.12-1.78) | <b>0.003</b>     | 1.39 (1.10-1.75) | <b>0.006</b>     |
| T2 (4.20<rLTL≤5.13)                             | 1.28 (1.02-1.60) | <b>0.032</b>     | 1.22 (0.97-1.53) | 0.085            | 1.19 (0.95-1.50) | 0.127            | 1.19 (0.93-1.51) | 0.169            | 1.17 (0.92-1.49) | 0.210            |
| T3 (rLTL>5.13)                                  | Reference        |                  |                  |                  |                  |                  |                  |                  |                  |                  |
| Age, years                                      |                  |                  | 1.04 (1.03-1.04) | <b>&lt;0.001</b> | 1.02 (1.01-1.03) | <b>&lt;0.001</b> | 1.00 (0.99-1.02) | 0.526            | 1.01 (0.99-1.02) | 0.349            |
| Diabetes duration, years                        |                  |                  |                  |                  | 1.04 (1.03-1.05) | <b>&lt;0.001</b> | 1.01 (1.00-1.02) | 0.169            | 1.00 (0.99-1.02) | 0.883            |
| BMI, kg/m <sup>2</sup>                          |                  |                  |                  |                  | 1.02 (0.99-1.04) | 0.194            | 0.99 (0.97-1.01) | 0.368            | 0.99 (0.97-1.02) | 0.508            |
| SBP, mmHg                                       |                  |                  |                  |                  | 1.02 (1.02-1.03) | <b>&lt;0.001</b> | 1.01 (1.01-1.02) | <b>&lt;0.001</b> | 1.01 (1.01-1.02) | <b>&lt;0.001</b> |
| DBP, mmHg                                       |                  |                  |                  |                  | 0.98 (0.97-0.99) | <b>0.001</b>     | 0.98 (0.97-0.99) | <b>&lt;0.001</b> | 0.98 (0.97-0.99) | <b>&lt;0.001</b> |
| HbA <sub>1c</sub> , mmol/mol                    |                  |                  |                  |                  |                  |                  | 1.01 (1.01-1.02) | <b>&lt;0.001</b> | 1.01 (1.01-1.02) | <b>&lt;0.001</b> |
| LDL-C, mmol/l                                   |                  |                  |                  |                  |                  |                  | 0.86 (0.78-0.94) | <b>0.001</b>     | 0.85 (0.77-0.93) | <b>0.001</b>     |
| Log (TG)                                        |                  |                  |                  |                  |                  |                  | 1.39 (0.90-2.16) | 0.142            | 1.49 (0.96-2.32) | 0.075            |
| HDL-C, mmol/l                                   |                  |                  |                  |                  |                  |                  | 1.22 (0.95-1.56) | 0.113            | 1.24 (0.97-1.57) | 0.088            |
| eGFR, ml min <sup>-1</sup> 1.73 m <sup>-2</sup> |                  |                  |                  |                  |                  |                  | 0.98 (0.97-0.98) | <b>&lt;0.001</b> | 0.98 (0.97-0.98) | <b>&lt;0.001</b> |
| Log (ACR)                                       |                  |                  |                  |                  |                  |                  | 3.20 (2.80-3.65) | <b>&lt;0.001</b> | 2.92 (2.54-3.36) | <b>&lt;0.001</b> |
| Neuropathy                                      |                  |                  |                  |                  |                  |                  |                  |                  | 1.18 (0.96-1.45) | 0.119            |
| CVD at baseline                                 |                  |                  |                  |                  |                  |                  |                  |                  | 0.88 (0.67-1.16) | 0.355            |

HR, hazard ratio; BMI, body mass index; SBP, systolic blood pressure; DBP, diastolic blood pressure; HbA<sub>1c</sub>, Haemoglobin A<sub>1c</sub>; LDL-C, low-density lipoprotein cholesterol; TG, triacylglycerol; HDL-C, high-density lipoprotein cholesterol; eGFR, estimated glomerular filtration rate; ACR, urinary albumin to creatinine ratio; rLTL, relative leucocyte telomere length calculated by negative control (water)

Sex and retinopathy were included as strata variables.

Model 1: without adjustment

Model 2: adjusted for age and sex

Model 3: Model 2 + adjusted for duration of diabetes, BMI, SBP and DBP

Model 4: Model 3 + adjusted for HbA<sub>1c</sub>, LDL-C, log<sub>10</sub> (triacylglycerol), HDL-C, eGFR and log<sub>10</sub> (ACR)

Model 5: Model 4 + retinopathy, neuropathy and CVD at baseline.



ESM Table 5 Linear regression analysis of the association between rLTL and eGFR change during follow-up period.

| Variables                                       | Model 1      |                  | Model 2      |                  | Model 3      |                  | Model 4        |                  | Model 5        |                  |
|-------------------------------------------------|--------------|------------------|--------------|------------------|--------------|------------------|----------------|------------------|----------------|------------------|
|                                                 | Beta ± SE    | <i>p</i> value   | Beta ± SE    | <i>p</i> value   | Beta ± SE    | <i>p</i> value   | Beta ± SE      | <i>p</i> value   | Beta ± SE      | <i>p</i> value   |
| Intercept                                       | -5.25 ± 0.32 | <b>&lt;0.001</b> | -1.28 ± 0.49 | <b>0.009</b>     | 2.01 ± 0.86  | <b>0.019</b>     | 0.65 ± 1.31    | 0.620            | 0.62 ± 1.30    | 0.634            |
| rLTL, ΔΔCt                                      | 0.42 ± 0.07  | <b>&lt;0.001</b> | 0.35 ± 0.07  | <b>&lt;0.001</b> | 0.27 ± 0.06  | <b>&lt;0.001</b> | 0.14 ± 0.06    | <b>0.021</b>     | 0.13 ± 0.06    | <b>0.029</b>     |
| Age, years                                      |              |                  | -0.06 ± 0.01 | <b>&lt;0.001</b> | -0.02 ± 0.01 | <b>0.006</b>     | -0.01 ± 0.01   | 0.121            | -0.01 ± 0.01   | 0.146            |
| Male                                            |              |                  | -0.37 ± 0.16 | <b>0.019</b>     | -0.60 ± 0.16 | <b>&lt;0.001</b> | -0.52 ± 0.15   | <b>0.001</b>     | -0.48 ± 0.15   | <b>0.002</b>     |
| Diabetes duration, years                        |              |                  |              |                  | -0.11 ± 0.01 | <b>&lt;0.001</b> | -0.04 ± 0.01   | <b>0.003</b>     | -0.02 ± 0.01   | 0.144            |
| BMI, kg/m <sup>2</sup>                          |              |                  |              |                  | 0.00 ± 0.02  | 0.836            | 0.03 ± 0.02    | 0.071            | 0.03 ± 0.02    | 0.116            |
| SBP, mmHg                                       |              |                  |              |                  | -0.05 ± 0.01 | <b>&lt;0.001</b> | -0.03 ± 0.01   | <b>&lt;0.001</b> | -0.03 ± 0.01   | <b>&lt;0.001</b> |
| DBP, mmHg                                       |              |                  |              |                  | 0.03 ± 0.01  | <b>0.006</b>     | 0.04 ± 0.01    | <b>&lt;0.001</b> | 0.04 ± 0.01    | <b>&lt;0.001</b> |
| HbA1c, mmol/mol                                 |              |                  |              |                  |              |                  | -0.030 ± 0.004 | <b>&lt;0.001</b> | -0.029 ± 0.004 | <b>&lt;0.001</b> |
| LDL-C, mmol/l                                   |              |                  |              |                  |              |                  | -0.04 ± 0.08   | 0.655            | -0.03 ± 0.08   | 0.710            |
| Log (TG)                                        |              |                  |              |                  |              |                  | -0.40 ± 0.36   | 0.269            | -0.56 ± 0.36   | 0.119            |
| HDL-C, mmol/l                                   |              |                  |              |                  |              |                  | 0.03 ± 0.21    | 0.873            | 0.01 ± 0.21    | 0.980            |
| eGFR, ml min <sup>-1</sup> 1.73 m <sup>-2</sup> |              |                  |              |                  |              |                  | 0.01 ± 0.01    | <b>0.019</b>     | 0.01 ± 0.01    | <b>0.050</b>     |
| Log (ACR)                                       |              |                  |              |                  |              |                  | -3.86 ± 0.15   | <b>&lt;0.001</b> | -3.67 ± 0.15   | <b>&lt;0.001</b> |
| Retinopathy                                     |              |                  |              |                  |              |                  |                |                  | -1.07 ± 0.18   | <b>&lt;0.001</b> |
| Neuropathy                                      |              |                  |              |                  |              |                  |                |                  | -0.65 ± 0.20   | <b>0.001</b>     |
| CVD at baseline                                 |              |                  |              |                  |              |                  |                |                  | 0.11 ± 0.24    | 0.655            |

BMI, body mass index; SBP, systolic blood pressure; DBP, diastolic blood pressure; HbA<sub>1c</sub>, Haemoglobin A1c; LDL-C, low-density lipoprotein cholesterol; TG, triacylglycerol; HDL-C, high-density lipoprotein cholesterol; eGFR, estimated glomerular filtration rate; ACR, urinary albumin to creatinine ratio; rLTL, relative leucocyte telomere length calculated by negative control (water)

Model 1: without adjustment

Model 2: adjusted for age and sex

Model 3: Model 2 + adjusted for duration of diabetes, BMI, SBP and DBP

Model 4: Model 3 + adjusted for HbA<sub>1c</sub>, LDL-C, log<sub>10</sub> (triacylglycerol), HDL-C, eGFR and log<sub>10</sub> (ACR)



Model 5: Model 4 + retinopathy, neuropathy and CVD at baseline.



ESM Table 6 Sensitivity analysis after excluding incident ESKD defined within 30 days of AKI diagnosis.

| Variables                                       | Model 1          |                | Model 2          |                | Model 3          |                | Model 4          |                | Model 5          |                |
|-------------------------------------------------|------------------|----------------|------------------|----------------|------------------|----------------|------------------|----------------|------------------|----------------|
|                                                 | HR (95%CI)       | <i>p</i> value | HR (95%CI)       | <i>p</i> value | HR (95%CI)       | <i>p</i> value | HR (95%CI)       | <i>p</i> value | HR (95%CI)       | <i>p</i> value |
| rLTL, $\Delta\Delta\text{Ct}$                   | 1.17 (1.08-1.27) | <0.001         | 1.13 (1.04-1.22) | 0.004          | 1.11 (1.03-1.20) | 0.01           | 1.09 (1.00-1.19) | 0.047          | 1.09 (1.00-1.19) | 0.052          |
| Age, years                                      |                  |                | 1.03 (1.03-1.04) | <0.001         | 1.02 (1.03)      | <0.001         | 1.00 (0.99-1.02) | 0.749          | 1.00 (0.99-1.01) | 0.849          |
| Diabetes duration, years                        |                  |                |                  |                | 1.03 (1.05)      | <0.001         | 1.01 (1.03)      | 0.314          | 1.01 (1.03)      | 0.35           |
| BMI, kg/m <sup>2</sup>                          |                  |                |                  |                | 1.01 (1.04)      | 0.348          | 0.99 (1.01)      | 0.336          | 0.99 (1.01)      | 0.338          |
| SBP, mmHg                                       |                  |                |                  |                | 1.02 (1.03)      | <0.001         | 1.01 (1.02)      | 0.004          | 1.01 (1.02)      | 0.004          |
| DBP, mmHg                                       |                  |                |                  |                | 0.99 (1.00)      | 0.021          | 0.98 (0.99)      | 0.003          | 0.98 (0.99)      | 0.004          |
| HbA <sub>1c</sub> , mmol/mol                    |                  |                |                  |                |                  |                | 1.01 (1.02)      | <0.001         | 1.01 (1.02)      | <0.001         |
| LDL-C, mmol/l                                   |                  |                |                  |                |                  |                | 0.83 (0.92)      | 0.001          | 0.82 (0.92)      | 0.001          |
| Log (TG)                                        |                  |                |                  |                |                  |                | 1.43 (2.39)      | 0.17           | 1.46 (2.45)      | 0.149          |
| HDL-C, mmol/l                                   |                  |                |                  |                |                  |                | 1.17 (1.55)      | 0.287          | 1.18 (1.56)      | 0.261          |
| eGFR, ml min <sup>-1</sup> 1.73 m <sup>-2</sup> |                  |                |                  |                |                  |                | 0.98 (0.98)      | <0.001         | 0.98 (0.98)      | <0.001         |
| Log (ACR)                                       |                  |                |                  |                |                  |                | 3.49 (4.10)      | <0.001         | 3.42 (4.03)      | <0.001         |
| Neuropathy                                      |                  |                |                  |                |                  |                |                  |                | 1.19 (1.52)      | 0.168          |
| CVD at baseline                                 |                  |                |                  |                |                  |                |                  |                | 1.00 (1.36)      | 0.977          |

HR, hazard ratio; BMI, body mass index; SBP, systolic blood pressure; DBP, diastolic blood pressure; HbA<sub>1c</sub>, Haemoglobin A1c; LDL-C, low-density lipoprotein cholesterol; TG, triacylglycerol; HDL-C, high-density lipoprotein cholesterol; eGFR, estimated glomerular filtration rate; ACR, urinary albumin to creatinine ratio; rLTL, relative leucocyte telomere length calculated by negative control (water). Sex and retinopathy were included as strata variables.

Model 1: without adjustment

Model 2: adjusted for age and sex

Model 3: Model 2 + adjusted for duration of diabetes, BMI, SBP and DBP

Model 4: Model 3 + adjusted for HbA1c, LDL-C,  $\log_{10}$  (triacylglycerol), HDL-C, eGFR and  $\log_{10}$  (ACR)

Model 5: Model 4 + retinopathy, neuropathy and CVD at baseline.

ESM Table 7 Cox regression showing the association between rLTL calculated based on QC materials and incident end stage kidney disease.

| Variables                                       | Model 1          |                  | Model 2          |                  | Model 3          |                  | Model 4          |                  | Model 5          |                  |
|-------------------------------------------------|------------------|------------------|------------------|------------------|------------------|------------------|------------------|------------------|------------------|------------------|
|                                                 | HR (95%CI)       | <i>p value</i>   | HR (95%CI)       | <i>p value</i>   | HR (95%CI)       | <i>p value</i>   | HR (95%CI)       | <i>p value</i>   | HR (95%CI)       | <i>p value</i>   |
| rLTL_QC, $\Delta\Delta Ct$                      | 1.24 (1.16-1.34) | <b>&lt;0.001</b> | 1.17 (1.09-1.26) | <b>&lt;0.001</b> | 1.15 (1.07-1.24) | <b>&lt;0.001</b> | 1.13 (1.04-1.23) | <b>0.003</b>     | 1.14 (1.05-1.23) | <b>0.002</b>     |
| Age, years                                      |                  |                  | 1.04 (1.03-1.04) | <b>&lt;0.001</b> | 1.02 (1.01-1.03) | <b>&lt;0.001</b> | 1.01 (1.00-1.02) | 0.316            | 1.01 (0.99-1.02) | 0.360            |
| Diabetes duration, years                        |                  |                  |                  |                  | 1.02 (1.01-1.04) | <b>0.001</b>     | 1.00 (0.99-1.02) | 0.784            | 1.00 (0.99-1.02) | 0.853            |
| BMI, kg/m <sup>2</sup>                          |                  |                  |                  |                  | 1.02 (0.99-1.04) | 0.179            | 0.99 (0.97-1.01) | 0.427            | 0.99 (0.97-1.01) | 0.435            |
| SBP, mmHg                                       |                  |                  |                  |                  | 1.02 (1.01-1.03) | <b>&lt;0.001</b> | 1.01 (1.01-1.02) | <b>&lt;0.001</b> | 1.01 (1.01-1.02) | <b>&lt;0.001</b> |
| DBP, mmHg                                       |                  |                  |                  |                  | 0.98 (0.97-0.99) | <b>0.001</b>     | 0.98 (0.97-0.99) | <b>&lt;0.001</b> | 0.98 (0.97-0.99) | <b>&lt;0.001</b> |
| HbA <sub>1c</sub> , mmol/mol                    |                  |                  |                  |                  |                  |                  | 1.01 (1.01-1.02) | <b>&lt;0.001</b> | 1.01 (1.01-1.02) | <b>&lt;0.001</b> |
| LDL-C, mmol/l                                   |                  |                  |                  |                  |                  |                  | 0.85 (0.78-0.94) | <b>0.001</b>     | 0.85 (0.77-0.93) | <b>0.001</b>     |
| Log (TG)                                        |                  |                  |                  |                  |                  |                  | 1.43 (0.92-2.21) | 0.108            | 1.48 (0.95-2.30) | 0.080            |
| HDL-C, mmol/l                                   |                  |                  |                  |                  |                  |                  | 1.22 (0.96-1.55) | 0.109            | 1.23 (0.96-1.56) | 0.096            |
| eGFR, ml min <sup>-1</sup> 1.73 m <sup>-2</sup> |                  |                  |                  |                  |                  |                  | 0.98 (0.97-0.98) | <b>&lt;0.001</b> | 0.98 (0.97-0.98) | <b>&lt;0.001</b> |
| Log (ACR)                                       |                  |                  |                  |                  |                  |                  | 2.99 (2.60-3.44) | <b>&lt;0.001</b> | 2.94 (2.55-3.38) | <b>&lt;0.001</b> |
| Neuropathy                                      |                  |                  |                  |                  |                  |                  |                  |                  | 1.20 (0.98-1.48) | 0.078            |
| CVD at baseline                                 |                  |                  |                  |                  |                  |                  |                  |                  | 0.88 (0.67-1.15) | 0.337            |

HR, hazard ratio; BMI, body mass index; SBP, systolic blood pressure; DBP, diastolic blood pressure; HbA<sub>1c</sub>, Haemoglobin A<sub>1c</sub>; LDL-C, low-density lipoprotein cholesterol; TG, triacylglycerol; HDL-C, high-density lipoprotein cholesterol; eGFR, estimated glomerular filtration rate; ACR, urinary albumin to creatinine ratio; rLTL, relative leucocyte telomere length calculated by QC.

Sex and retinopathy were included as strata variables.

Model 1: without adjustment

Model 2: adjusted for age and sex

Model 3: Model 2 + adjusted for duration of diabetes, BMI, SBP and DBP

Model 4: Model 3 + adjusted for HbA1c, LDL-C,  $\log_{10}$  (triacylglycerol), HDL-C, eGFR and  $\log_{10}$  (ACR)

Model 5: Model 4 + retinopathy, neuropathy and CVD at baseline.

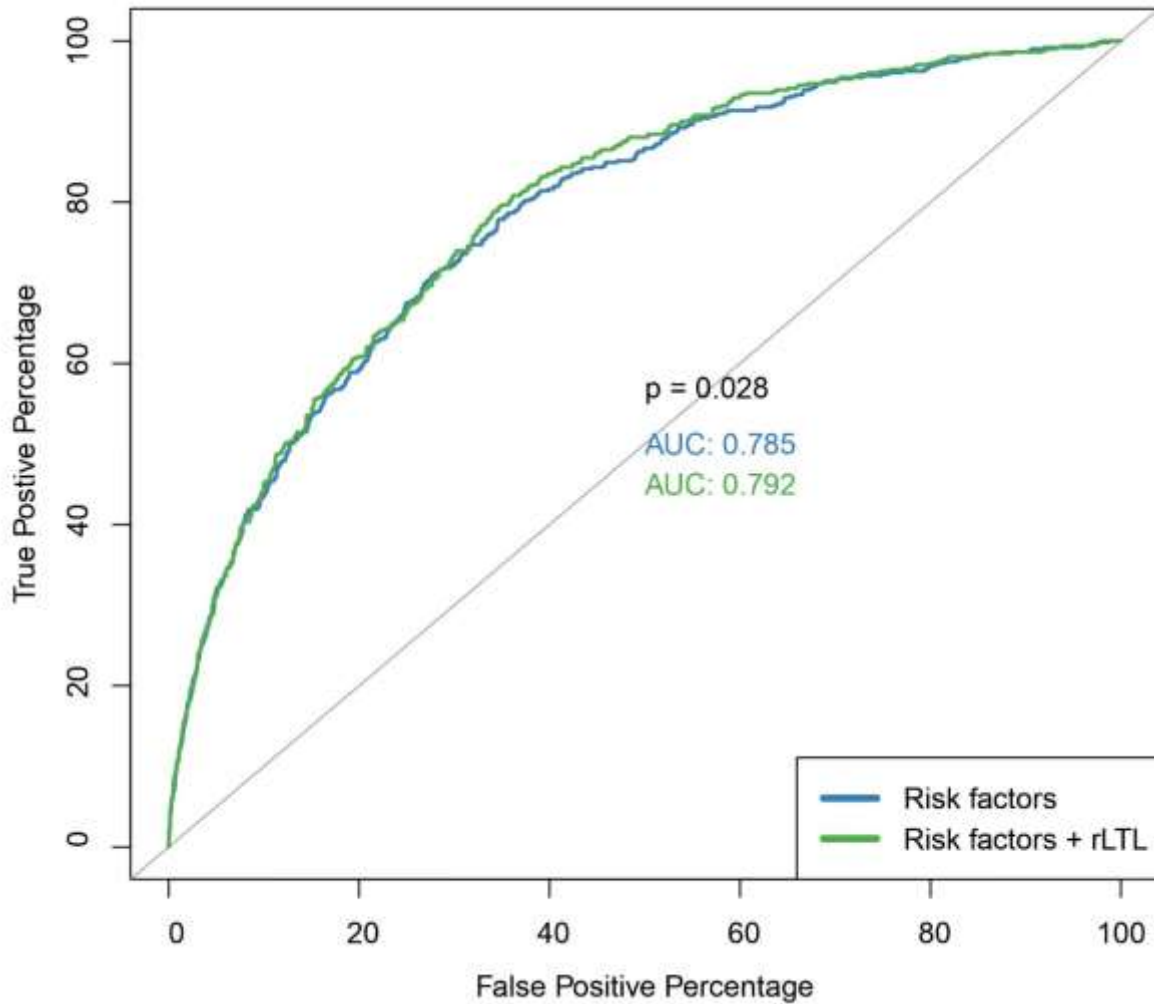

ESM Figure 1. Receiver operating characteristic curve (ROC) for prediction of end stage kidney disease. Traditional risk factors models with or without inclusion of rLTL (Area under the curve: 0.792 (0.772-0.813) vs. 0.785 (0.764-0.806),  $P=0.002$ ). rLTL: relative leucocyte telomere length calculated by negative control (water).

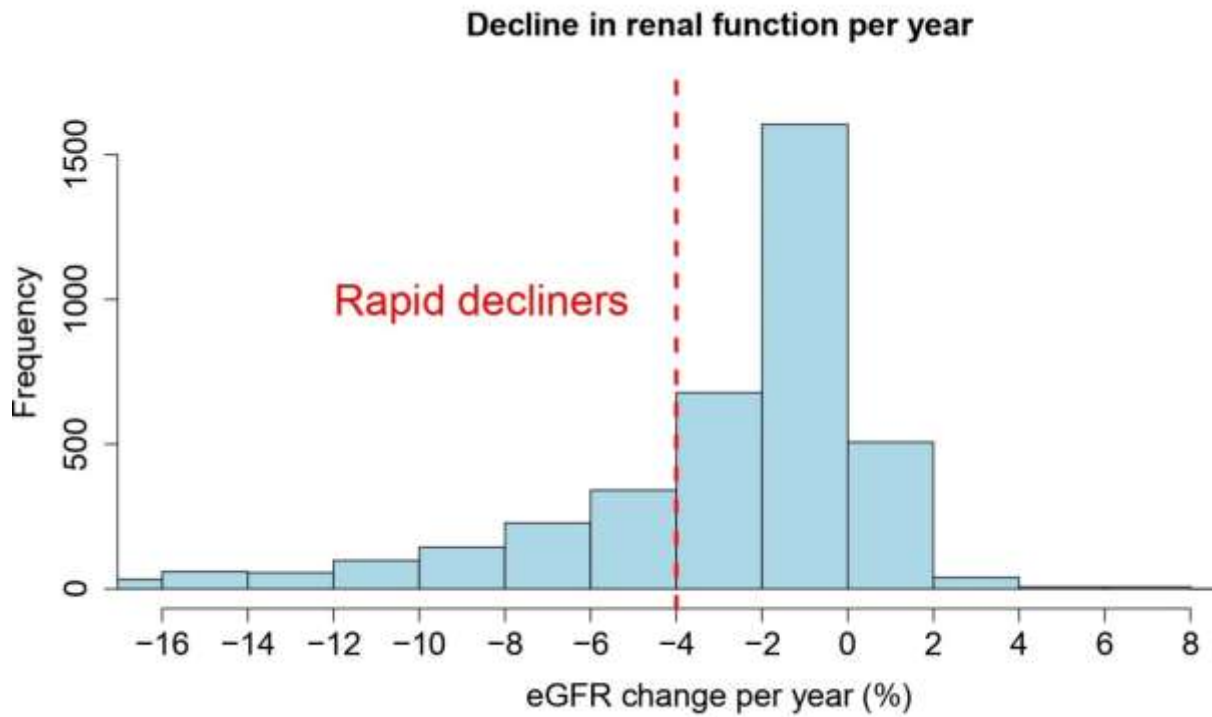

ESM Figure 2. The histogram of decline in renal function per year during follow-up. Patients with eGFR decline of  $>4\%/year$  were defined as rapid decliners.



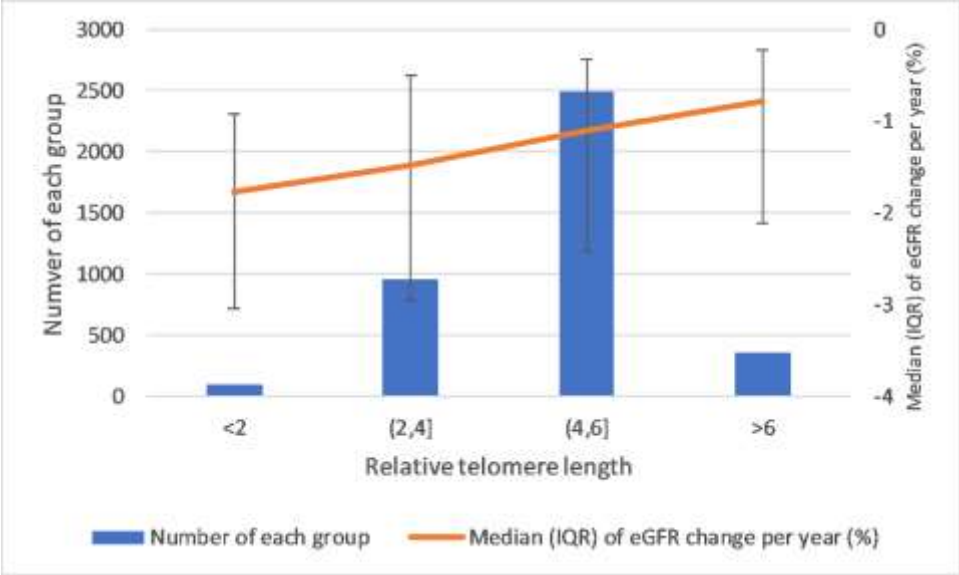

ESM Figure 3. Association between rLTL at baseline and median (IQR) of eGFR change per year during the follow-up period.

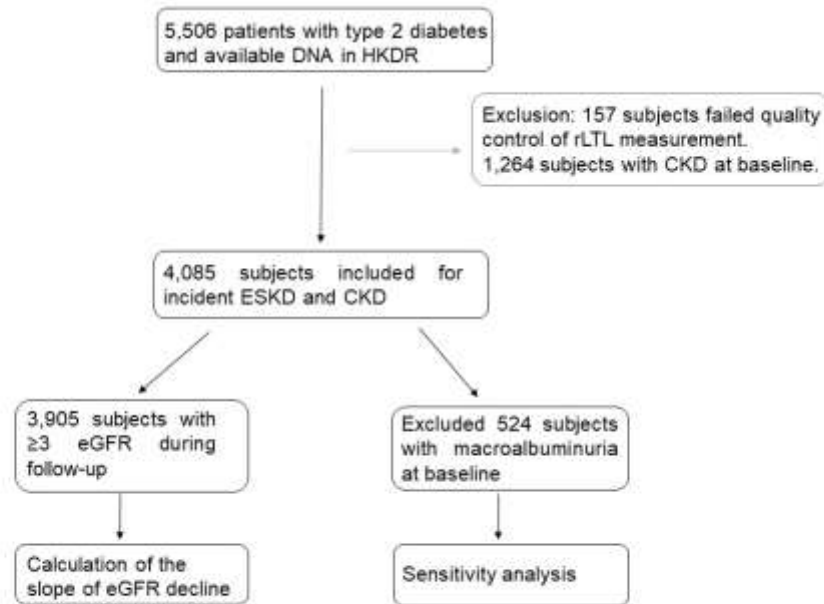

ESM Figure 4. Flow diagram of patient selection

Abbreviation: HKDR, Hong Kong Diabetes Register; rLTL, relative leucocyte telomere length; CKD, chronic kidney disease; ESKD, end stage kidney disease; eGFR, estimated glomerular filtration rate
